# Supplementary material for: Adding venetoclax to fludarabine/busulfan RIC transplant for high-risk MDS and AML is feasible, safe, and active
Source: PubMed Central journal article supplement — Blood Adv. 2021 Dec 17;5(24):5536–45. doi: 10.1182/bloodadvances.2021005566 (PMC8714724; doi:10.1182/bloodadvances.2021005566), 2021-12-17
Supplement: advancesADV2021005566-suppl1.pdf [file advancesADV2021005566-suppl1.pdf]

## Supplemental Materials

- I. Supplemental Methods
  - a. Duplex Next Generation Sequencing
  - b. BH3 profiling
  - c. Cell lines, viability and synergy evaluation
  - d. References for Methods
  
- II. Supplemental Figure Legends and Figures
  - a. Supplemental Figure 1. Baseline *TP53* mutation status and outcome.
  - b. Supplemental Figure 2. BH3 profiling of monocyte population in screening marrow samples.
  - c. Supplemental Figure 3. Effect of combination venetoclax and busulfan in AML cells.
  
- III. Supplemental Tables
  - a. Supplemental Table 1: Gene List
  - b. Supplemental Table 2: Patient-Level MRD Responses Detailed
  - c. Supplemental Table 3: Individual Patient Pre/Post-Transplant Mutations

## **I. Supplemental Methods**

### **a. Duplex Next Generation Sequencing**

We selected 45 genes for targeted sequencing based on their recurrent alteration in myeloid malignancies (Supplemental Table 1).

#### Library Construction, quantification, and normalization

500ng genomic DNA was used as input for DNA fragmentation using a Covaris acoustic ultrasonicator, targeting 150 bp fragments. Library preparation was performed using the KAPA Biosystems (KAPA HyperPrep Kit with Library Amplification product KK8504) and IDT's duplex UMI adapters. The libraries were then paired with unique 8-base dual index sequences embedded within the p5 and p7 primers (IDT) during PCR. Enzymatic clean-ups were performed using Beckman Coulter AMPure XP beads. Libraries were quantified using the INvitrogen Quant-It broad range dsDNA quantification assay kit (Thermo Scientific) with a 1:200 PicoGreen dilution. Each library was normalized to 35ng/uL using Tris-HCl, 10 mM, pH 8.0.

#### Hybrid Selection, Cluster Amplification, and Sequencing

In solution hybrid selection was performed using IDT's XGen hybridization and wash kit, with creation of 12-plex pre-hybridization pools. Custom exome bait (TWIST bioscience) was added to the lyophilized pool prior to resuspension, followed by library normalization and hybridization performed using a Hamilton Starlet liquid handling platform and target capture on an Agilent Bravo automated platform. Post capture, a PCR was performed to

amplify the captured DNA. Cluster amplification using Exclusion Amplification cluster chemistry and HiSeq amplification was performed according to manufacturer's protocol (Illumina) and using HiSeq X flowcells. Flowcells were sequenced on v2 Sequencing-by-Synthesis chemistry for HiSeq X flowcells. The flowcells were then analyzed using RTA v.2.7.3 or later. Each pool of whole genome libraries was run on paired 151 bp runs, reading the dual-indexed sequences to identify molecular indices and sequenced across the number of lanes needed to meet coverage for all libraries in the pool.

### Variant calling

Reads were aligned with bwa-mem 0.7.15. Duplex consensus reads were called with fgbio 1.0 and realigned using bwa-mem. Consensus reads were required to have reads from both families  $\alpha\beta$  and  $\beta\alpha$ , and consensus reads with Ns in excess of 5% of bases were discarded. Read one and two were soft-clipped from the 5' end by 10 bases to reduce errors due to end repair. Single nucleotide and small insertion and deletion calling was performed with samtools-0.1.18 mpileup and VarScan 2.2.3. Variants were annotated to include information about cDNA and amino acid changes, sequence depth, number, and percentage of reads supporting the variant allele, population allele frequency in the Genome Aggregation Database (gnomAD). Variants were excluded if they had fewer than two total duplex-reassembled alternate reads at the position or fell outside of the target coordinates, caused synonymous changes, or were recurrent small insertions/deletions at low variant allele fraction adjacent to homopolymer repeat regions. Individual single nucleotide substitutions and small insertions or deletions were evaluated as candidate drivers of myeloid malignancies based on gene-specific characteristics, then curated

manually and classified as driver mutations based on genetic criteria and literature review. All interpretation of variants was blinded to clinical characteristics and thus agnostic to variables including age, sex, diagnosis, treatment status, and clinical outcomes; the genetic analysis was completed and locked prior to merging with any clinical data. The presence of sole persisting *DNMT3A* or *TET2* mutations was considered NGS-negative in post-diagnosis samples.

### b. BH3 profiling

BH3 profiling was performed using the Eppendorf epMotion 5075I automated pipetting platform (Eppendorf, Enfield, CT, USA).<sup>1</sup> Bone marrow mononuclear cells were exposed to synthetic BH3 peptides after plasma membrane permeabilization with digitonin and sensitivity to BH3 peptides was measured by cytochrome c release using an iQue Screener Plus VBR flow cytometer, which uses Forecyt v8.2 software for acquisition, gating, and data export (Essen Bioscience/Sartorius, Ann Arbor, MI). Cytochrome c (Biolegend 983502) was stained overnight and the median fluorescence intensity (MFI) was calculated for each cell population. FMO served as a control well lacking the cytochrome c antibody. Cytochrome c release was calculated using the following formula:

$$\text{Cyto c Release} = 1 - \frac{MFI_{\text{sample}} - MFI_{\text{FMO}}}{MFI_{\text{Buffer alone}} - MFI_{\text{FMO}}}$$

Values reported are the average of two technical duplicates for every treatment. DMSO and alamethicin were used as negative and positive controls, respectively. Cells were gated based on SSC, CD45 (BD 348805), CD33 (BD 340679), CD14 (BD 659450), CD11b (Biolegend 982608), and CD16 (Biolegend 980108) status. Individual flow plots

underwent hematopathology review. A minimum of 50 events per population per well was required to calculate cytochrome c release.

**c. Cell lines, viability and synergy evaluation**

AML cell lines (OCI-AML3 and OCI-AML2) were acquired from Dr. Benjamin Ebert's lab and authenticated by short tandem repeat analysis. Cell viability was measured using CellTiter Glo assay according to manufacturer's instructions (Promega). The effects of combining busulfan with venetoclax were calculated using the zero interaction potency model, where a positive delta score indicates percentage of cell inhibition, on the web-based synergyfinder application (<http://synergyfinder.org>).

## References

1. Ryan J, Montero J, Rocco J, Letai A. iBH3: simple, fixable BH3 profiling to determine apoptotic priming in primary tissue by flow cytometry. *Biol Chem* 2016;397:671-8.

## II. Supplemental Figure Legends and Figures

**Supplemental Figure 1. Baseline *TP53* mutation status and outcome.** Probability of (A) overall survival and (B) progression free survival based on baseline *TP53* wild type (black) versus *TP53* mutated (red) status shown here.

**Supplemental Figure 2. BH3 profiling of monocyte population in screening marrow samples.** Pre-transplant bone marrow samples from 12 patients treated at highest dose level (DL3) underwent BH3 profiling using venetoclax (10  $\mu$ M) directly on mitochondria. Monocytes were gated using CD33+CD14+ immunophenotypic markers. At least 50 events/population per well were required for analysis. Cytochrome c release (to indicate mitochondrial apoptotic priming sensitivity) after venetoclax exposure and association to response status was explored.

**Supplemental Figure 3. Effect of combination venetoclax and busulfan in AML cells.** OCI-AML3 and OCI-AML2 cells were treated with busulfan and venetoclax treatment alone and in combination. Summary delta scores to quantify synergistic effects were calculated to average the overall interaction effect over all the dose pairs for a drug combination. Red and green indicate higher and lower delta score, respectively.

Supplemental Figure 1. Baseline *TP53* mutation status and outcome

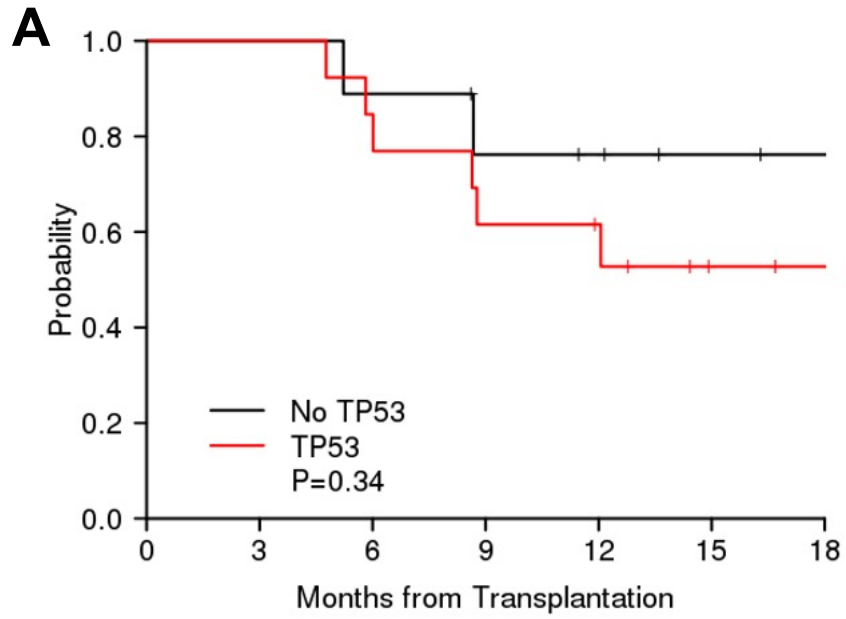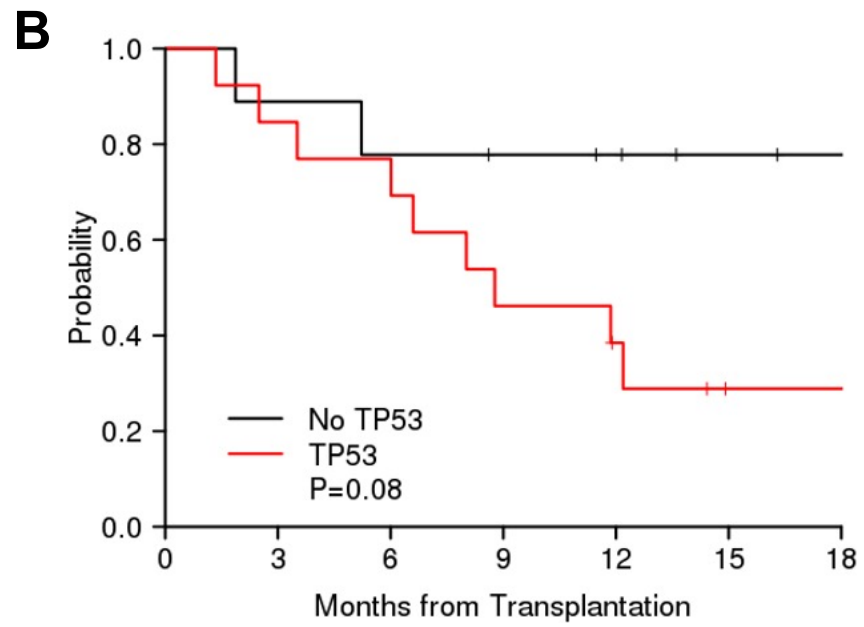



Supplemental Figure 2. BH3 profiling of monocyte population in screening marrow samples.

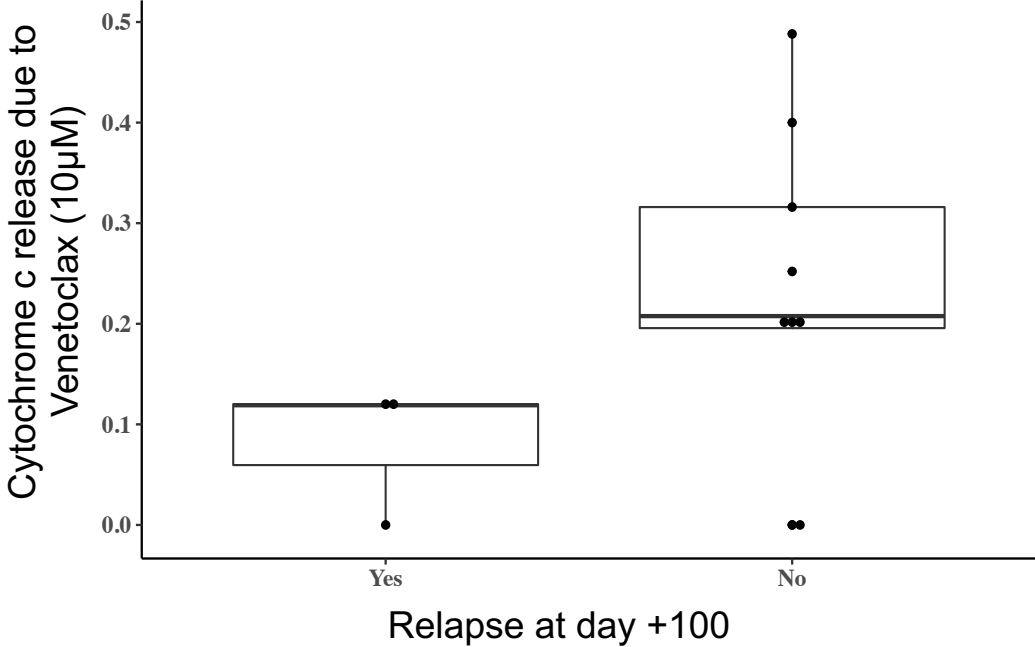

Supplemental Figure 3. Effect of combination venetoclax and busulfan in AML cells.

delta score: 70.448

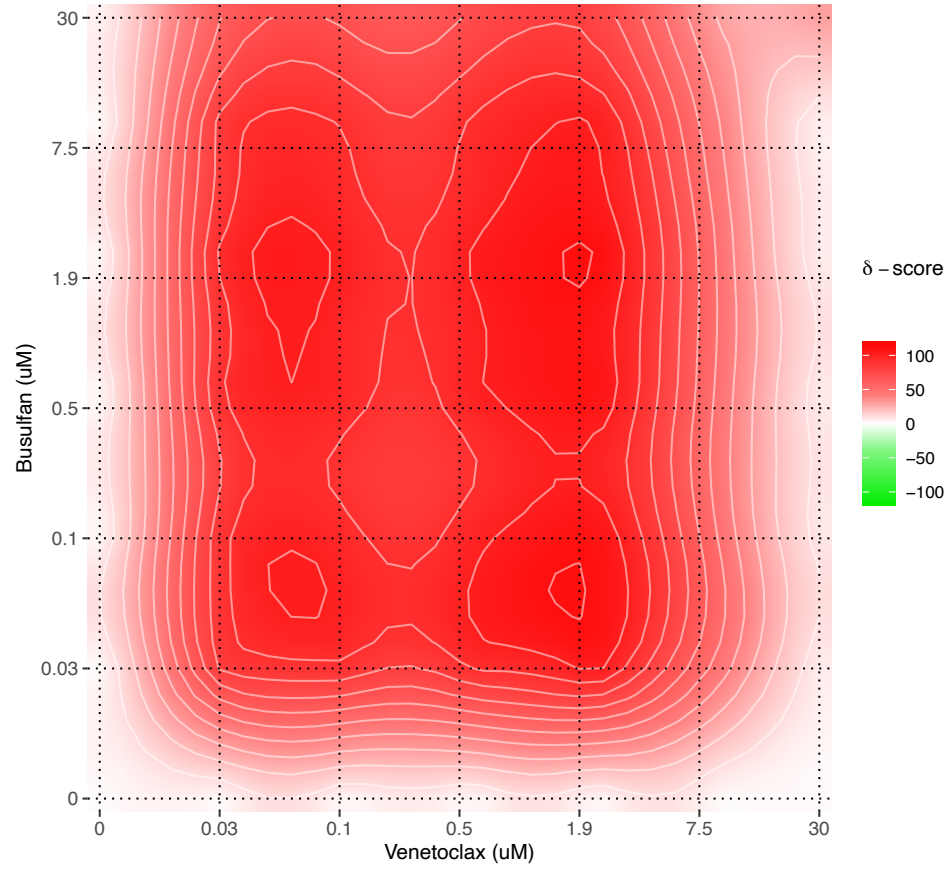

OCI-AML3

delta score: 3.153

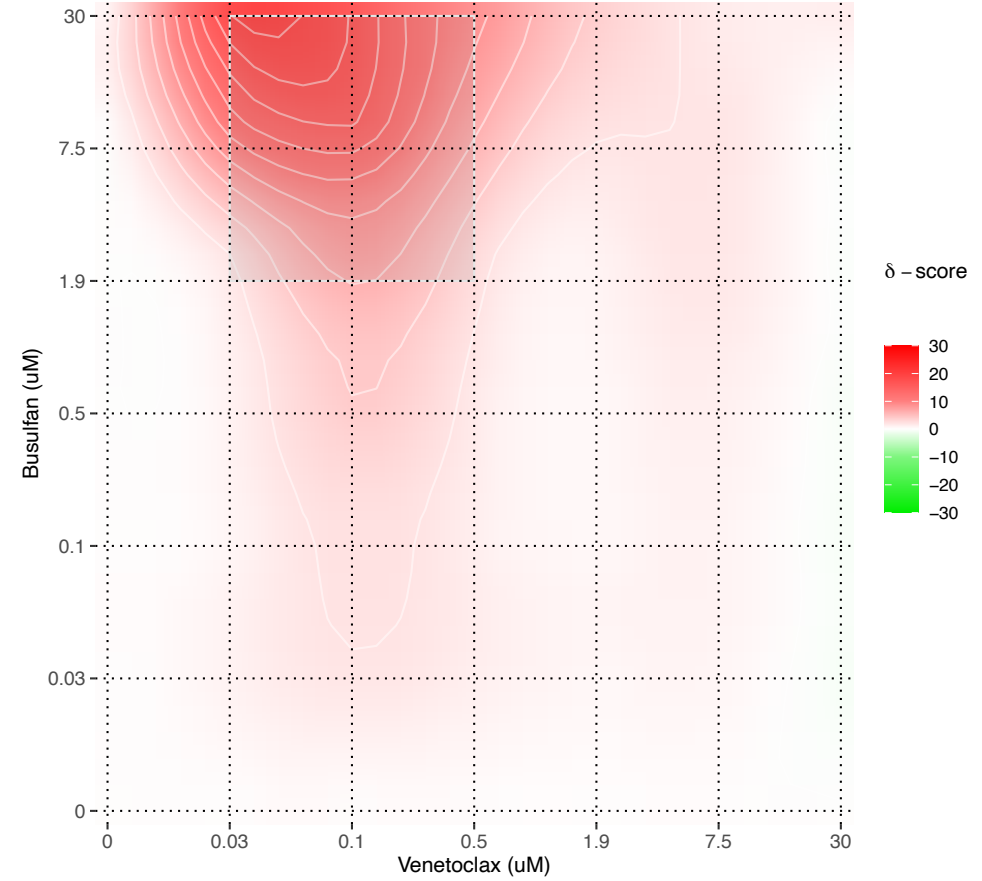

OCI-AML2

### III. Supplemental Tables

**Supplemental Table 1. Gene List.**

|        |
|--------|
| ASXL1  |
| ATM    |
| BCOR   |
| BCORL1 |
| CBL    |
| CEBPA  |
| CREBBP |
| CSF3R  |
| CUX1   |
| DDX41  |
| DNMT3A |
| EP300  |
| ETV6   |
| EZH2   |
| FLT3   |
| GATA2  |
| GNB1   |
| IDH1   |
| IDH2   |
| IKZF1  |
| JAK2   |
| KIT    |
| KRAS   |
| MYC    |
| NF1    |
| NFE2   |
| NPM1   |
| PPM1D  |
| PRPF8  |
| PTPN11 |
| RAD21  |
| RIT1   |
| RUNX1  |
| SETBP1 |
| SF3B1  |

|              |
|--------------|
| SH2B3        |
| SMC1A        |
| SMC3         |
| SRSF2        |
| STAG2        |
| TERTpromoter |
| TET2         |
| TP53         |
| WT1          |
| ZRSR2        |

**Supplemental Table 2. Patient-Level Responses Detailed**

| DL | Patient | Disease                 | Pre-transplant          | Day +100                | + 6 months              | +12 months              |
|----|---------|-------------------------|-------------------------|-------------------------|-------------------------|-------------------------|
| 1  | 1       | MDS                     | Flow MRD n/a<br>NGS pos | Flow MRD n/a<br>NGS pos | Flow MRD n/a<br>NGS pos | Relapse                 |
|    | 2       | AML                     | Flow MRD pos<br>NGS pos | Flow MRD neg<br>NGS pos | Flow MRD neg<br>NGS neg | Flow MRD neg<br>NGS neg |
|    | 3       | MDS                     | Flow MRD n/a<br>NGS pos | Flow MRD n/a<br>NGS pos | Flow MRD n/a<br>NGS n/a | Deceased                |
| 2  | 4       | MDS                     | Flow MRD n/a<br>NGS pos | Flow MRD n/a<br>NGS pos | Relapse                 | Deceased                |
|    | 5       | MDS                     | Flow MRD n/a<br>NGS pos | Flow MRD n/a<br>NGS neg | Flow MRD n/a<br>NGS neg | Relapse                 |
|    | 6       | CMML                    | Flow MRD n/a<br>NGS pos | Flow MRD n/a<br>NGS neg | Flow MRD n/a<br>NGS neg | Flow MRD n/a<br>NGS neg |
| 3  | 7       | AML                     | Flow MRD pos<br>NGS pos | Flow MRD n/a<br>NGS neg | Flow MRD neg<br>NGS neg | Flow MRD neg<br>NGS neg |
|    | 8       | AML                     | Flow MRD n/a<br>NGS pos | Flow MRD n/a<br>NGS pos | Relapse                 | Deceased                |
|    | 9       | MDS                     | Flow MRD pos<br>NGS pos | Relapse                 | Deceased                | Deceased                |
|    | 10      | AML                     | Flow MRD pos<br>NGS pos | Relapse                 | Deceased                | Deceased                |
|    | 11      | MDS                     | Flow MRD pos<br>NGS pos | Flow MRD neg<br>NGS neg | Flow MRD neg<br>NGS pos | Flow MRD pos<br>NGS pos |
|    | 12      | AML                     | Flow MRD neg<br>NGS neg | Flow MRD neg<br>NGS neg | Flow MRD n/a<br>NGS neg | Flow MRD neg<br>NGS n/a |
|    | 13      | MDS                     | Flow MRD n/a<br>NGS pos | Flow MRD n/a<br>NGS neg | Flow MRD n/a<br>NGS n/a | Flow MRD n/a<br>NGS neg |
|    | 14      | MDS                     | Flow MRD n/a<br>NGS pos | Flow MRD neg<br>NGS neg | Flow MRD n/a<br>NGS n/a | Flow MRD neg<br>NGS neg |
|    | 15      | MDS/MPN                 | Flow MRD neg<br>NGS neg |
|    | 16      | AML                     | Flow MRD n/a<br>NGS pos | Flow MRD neg<br>NGS neg | Flow MRD n/a<br>NGS n/a | Deceased                |
|    | 17      | MDS                     | Flow MRD neg<br>NGS neg | Flow MRD neg<br>NGS neg | Flow MRD neg<br>NGS neg | Flow MRD neg<br>NGS n/a |
|    | 18      | MDS                     | Flow MRD pos<br>NGS pos | Relapse                 | n/a                     | n/a                     |
|    | 19      | MDS                     | Flow MRD pos<br>NGS pos | Flow MRD neg<br>NGS n/a | Flow MRD neg<br>NGS pos | Flow MRD neg<br>NGS n/a |
|    | 20      | MDS                     | Flow MRD n/a<br>NGS pos | Flow MRD neg<br>NGS n/a | Flow MRD n/a<br>NGS neg | Deceased                |
| 21 | MDS     | Flow MRD neg<br>NGS neg | Flow MRD pos<br>NGS n/a | Flow MRD neg<br>NGS neg | Flow MRD neg<br>NGS n/a |                         |
| 22 | AML     | Flow MRD neg<br>NGS pos | Flow MRD neg<br>NGS n/a | Flow MRD neg<br>NGS n/a | Flow MRD neg<br>NGS n/a |                         |

**Supplemental Table 3: Individual Patient Pre/Post-Transplant Mutations**

| subject id | gene    | cdna                                                    | aa                  | result                  | Dx | Screening | Day +28       | Day +100      | Day +159      | +6 months | Day +261 | +1 year       |
|------------|---------|---------------------------------------------------------|---------------------|-------------------------|----|-----------|---------------|---------------|---------------|-----------|----------|---------------|
| 1          | CSF3R   | c.2326T                                                 | p.Q776X             | stopgain                | N  | N         | X             | N             | X             | Y         | Y        | X             |
| 1          | KRAS    | c.C64A                                                  | p.G22K              | nonsynonymous SNV       | N  | N         | X             | N             | X             | N         | Y        | X             |
| 1          | NF1     | c.G38C                                                  | p.A320P             | nonsynonymous SNV       | N  | N         | X             | N             | X             | Y         | Y        | X             |
| 1          | TP53    | c.G517A                                                 | p.V173M             | nonsynonymous SNV       | Y  | Y         | X             | Y             | X             | Y         | Y        | X             |
| 2          | ASXL1   | c.2011_2018del                                          | p.A671fs            | frameshift deletion     | Y  | Y         | X             | Y             | X             | N         | X        | N             |
| 2          | CREBBP  | c.5545A>T                                               | p.K1849*            | nonsense                | Y  | N         | X             | N             | X             | N         | X        | N             |
| 2          | CUX1    | c.2616delA.c.2649delA                                   | p.G872fs.p.G883fs   | frameshift deletion     | N  | Y         | X             | N             | X             | N         | X        | N             |
| 2          | CUX1    | c.C2485T.c.C2518T                                       | p.Q829X.p.Q840X     | stopgain                | N  | Y         | X             | N             | X             | N         | X        | N             |
| 2          | DNMT3A  | c.A418T                                                 | p.K140X             | stopgain                | N  | N         | X             | N             | X             | Y         | Y        | X             |
| 2          | DNMT3A  | c.A2477C                                                | p.K826T             | nonsynonymous SNV       | N  | N         | X             | Y             | X             | Y         | X        | Y             |
| 2          | DNMT3A  | c.C1135T                                                | p.R379C             | nonsynonymous SNV       | N  | N         | X             | N             | X             | N         | X        | Y             |
| 2          | EP300   | c.4915delC                                              | p.L1639fs           | frameshift deletion     | N  | Y         | X             | N             | X             | N         | X        | N             |
| 2          | IDH1    | c.G395A                                                 | p.R132H             | nonsynonymous SNV       | Y  | Y         | X             | indeterminate | X             | N         | X        | N             |
| 2          | RAD21   | c.1636delG                                              | p.G564fs            | frameshift deletion     | N  | Y         | X             | N             | X             | N         | X        | N             |
| 2          | RAD21   | c.1435delA                                              | p.P483fs            | frameshift deletion     | N  | Y         | X             | N             | X             | N         | X        | N             |
| 2          | SETBP1  | c.G2802A                                                | p.D868N             | nonsynonymous SNV       | Y  | Y         | X             | N             | X             | N         | X        | N             |
| 2          | SH2B3   | c.110delC                                               | p.A37fs             | frameshift deletion     | N  | Y         | X             | N             | X             | N         | X        | N             |
| 2          | SRSF2   | c.285_308del                                            | p.95_103del         | nonframeshift deletion  | N  | Y         | X             | Y             | X             | N         | X        | N             |
| 2          | TET2    | c.G3662T                                                | p.C1221F            | nonsynonymous SNV       | N  | Y         | X             | N             | X             | N         | X        | N             |
| 2          | TET2    | c.G3739T                                                | p.E1247X            | stopgain                | N  | Y         | X             | N             | X             | N         | X        | N             |
| 2          | TET2    | c.C5609A                                                | p.S1870X            | stopgain                | N  | N         | X             | Y             | X             | Y         | X        | Y             |
| 2          | ZRSR4   | c.1002delT                                              | p.R334fs            | frameshift deletion     | N  | Y         | X             | N             | X             | N         | X        | N             |
| 3          | DNMT3A  | c.T2261A                                                | p.L754H             | nonsynonymous SNV       | N  | Y         | X             | N             | X             | X         | X        | X             |
| 3          | NFE2    | c.783_786del                                            | p.E261fs            | frameshift deletion     | N  | Y         | X             | N             | X             | X         | X        | X             |
| 3          | NFE2    | c.G818T                                                 | p.R273L             | nonsynonymous SNV       | N  | Y         | X             | N             | X             | X         | X        | X             |
| 3          | TET2    | c.A3910G                                                | p.K1304E            | nonsynonymous SNV       | N  | Y         | X             | indeterminate | X             | X         | X        | X             |
| 3          | TET2    | c.C2872T                                                | p.Q958X             | stopgain                | N  | Y         | X             | N             | X             | X         | X        | X             |
| 3          | TP53    | c.A550dupC                                              | p.P152fs            | frameshift insertion    | Y  | Y         | X             | Y             | X             | X         | X        | X             |
| 3          | TP53    | c.C844T                                                 | p.R282W             | nonsynonymous SNV       | Y  | Y         | X             | N             | X             | N         | X        | X             |
| 4          | DNMT3A  | c.1881delA                                              | p.P627fs            | frameshift deletion     | N  | Y         | X             | N             | X             | X         | X        | X             |
| 4          | DNMT3A  | c.C1584A                                                | p.Y528X             | stopgain                | Y  | Y         | X             | Y             | X             | X         | X        | X             |
| 4          | GNB1    | c.A266G                                                 | p.K89R              | nonsynonymous SNV       | N  | Y         | X             | Y             | X             | X         | X        | X             |
| 4          | IDH1    | c.G395A                                                 | p.R132H             | nonsynonymous SNV       | N  | Y         | X             | Y             | X             | X         | X        | X             |
| 4          | PPM1D   | c.G1426T                                                | p.E476X             | stopgain                | N  | Y         | X             | N             | X             | X         | X        | X             |
| 4          | PPM1D   | c.C1854A                                                | p.R552X             | stopgain                | N  | Y         | X             | N             | X             | X         | X        | X             |
| 4          | SF3B1   | c.A2294A                                                | p.Y765C             | nonsynonymous SNV       | N  | Y         | X             | N             | X             | X         | X        | X             |
| 4          | TET2    | c.T3819G                                                | p.C1273W            | nonsynonymous SNV       | N  | Y         | X             | N             | X             | X         | X        | X             |
| 4          | TET2    | c.C2905T                                                | p.Q969X             | stopgain                | N  | Y         | X             | indeterminate | X             | X         | X        | X             |
| 4          | TP53    | c.C455T                                                 | p.P152L             | nonsynonymous SNV       | Y  | Y         | X             | Y             | X             | X         | X        | X             |
| 4          | TP53    | c.C722T                                                 | p.S241F             | nonsynonymous SNV       | Y  | Y         | X             | Y             | X             | X         | X        | X             |
| 5          | DNMT3A  | c.G2225T                                                | p.R742L             | nonsynonymous SNV       | N  | N         | X             | Y             | X             | Y         | X        | Y             |
| 5          | IDH1    | c.C394T                                                 | p.R132C             | nonsynonymous SNV       | N  | N         | X             | N             | X             | N         | X        | Y             |
| 5          | PPM1D   | c.C1384T                                                | p.Q462X             | stopgain                | N  | Y         | X             | N             | X             | N         | X        | N             |
| 5          | PPM1D   | c.1528delC                                              | p.Q510fs            | frameshift deletion     | N  | N         | X             | N             | X             | N         | X        | indeterminate |
| 5          | SMC3    | c.3239delG                                              | p.G1080fs           | frameshift deletion     | N  | Y         | X             | N             | X             | N         | X        | N             |
| 5          | TP53    | c.A659G                                                 | p.Y220C             | nonsynonymous SNV       | Y  | Y         | X             | N             | X             | N         | X        | Y             |
| 6          | ASXL1   | c.2404G>T                                               | p.E802*             | nonsense                | Y  | Y         | N             | N             | X             | N         | X        | N             |
| 6          | BCOR    | c.4981G>T                                               | p.R1627*            | nonsense                | N  | Y         | N             | N             | X             | N         | X        | N             |
| 6          | RUNX1   | c.215_215msA                                            | p.R716*             | frameshift insertion    | Y  | Y         | N             | N             | X             | N         | X        | N             |
| 6          | SETBP1  | c.2603A>G                                               | p.D668G             | missense                | Y  | Y         | N             | N             | X             | N         | X        | N             |
| 7          | FLT3    | c.2503G>A                                               | p.D835N             | missense                | Y  | N         | N             | N             | X             | N         | X        | N             |
| 7          | TP53    | c.502delC                                               | p.H168fs            | frameshift deletion     | N  | Y         | indeterminate | N             | X             | N         | X        | N             |
| 7          | TP53    | c.T584C                                                 | p.I195T             | nonsynonymous SNV       | Y  | Y         | indeterminate | N             | X             | N         | X        | N             |
| 7          | TP53    | c.A751T                                                 | p.I251F             | nonsynonymous SNV       | Y  | Y         | N             | N             | X             | N         | X        | N             |
| 7          | TP53    | c.G742T                                                 | p.R248W             | nonsynonymous SNV       | N  | Y         | N             | N             | X             | N         | X        | N             |
| 7          | TP53    | c.502delG                                               | p.Q167fs*3          | frameshift deletion     | Y  | N         | N             | N             | X             | N         | X        | N             |
| 8          | DNMT3A  | c.G2120A                                                | p.G707D             | nonsynonymous SNV       | X  | Y         | X             | N             | N             | X         | X        | X             |
| 8          | PPM1D   | c.1363_1366del                                          | p.E455fs            | frameshift deletion     | X  | Y         | X             | N             | N             | X         | X        | X             |
| 8          | PPM1D   | c.A1603T                                                | p.K535X             | stopgain                | X  | Y         | X             | N             | N             | X         | X        | X             |
| 8          | PPM1D   | c.1445delT                                              | p.L482fs            | frameshift deletion     | X  | Y         | X             | N             | N             | X         | X        | X             |
| 8          | PPM1D   | c.1605delA                                              | p.S536fs            | frameshift deletion     | X  | Y         | X             | N             | N             | X         | X        | X             |
| 8          | PPM1D   | c.C1854A                                                | p.R552X             | stopgain                | X  | Y         | X             | N             | N             | X         | X        | X             |
| 8          | PPM1D   | c.1465delT                                              | p.S489fs            | frameshift deletion     | N  | Y         | X             | Y             | indeterminate | X         | X        | X             |
| 8          | TP53    | c.G830C                                                 | p.C277S             | nonsynonymous SNV       | X  | N         | X             | N             | indeterminate | X         | X        | X             |
| 8          | TP53    | c.A623G                                                 | p.D208G             | nonsynonymous SNV       | X  | Y         | X             | indeterminate | N             | X         | X        | X             |
| 8          | TP53    | c.C817T                                                 | p.R273C             | nonsynonymous SNV       | X  | Y         | X             | Y             | Y             | X         | X        | X             |
| 8          | TP53    | c.C844T                                                 | p.R282W             | nonsynonymous SNV       | X  | Y         | X             | N             | X             | X         | X        | X             |
| 9          | TP53    | c.524-2A>G.c.920-2A>G.c.443-2A>G.c.803-2A>G.c.803-2A>G) | c.524-2A>G          | splicing                | N  | Y         | Y             | X             | X             | X         | X        | X             |
| 9          | TP53    | c.C574T                                                 | p.Q192X             | stopgain                | Y  | Y         | Y             | X             | X             | X         | X        | X             |
| 10         | KRAS    | c.532_534del                                            | p.178_178del        | nonframeshift deletion  | N  | Y         | Y             | X             | X             | X         | X        | X             |
| 10         | NF1     | c.7265_7266del.c.7202_7203del                           | p.K2422fs.p.K2401fs | frameshift deletion     | N  | Y         | N             | X             | X             | X         | X        | X             |
| 11         | DNMT3A  | c.G1228A                                                | p.A410T             | nonsynonymous SNV       | N  | Y         | X             | N             | X             | N         | X        | N             |
| 11         | TET2    | c.G4108A                                                | p.G1370R            | nonsynonymous SNV       | N  | N         | X             | N             | X             | Y         | X        | Y             |
| 11         | TET2    | c.C4256G                                                | p.P1419R            | nonsynonymous SNV       | N  | Y         | X             | N             | X             | N         | X        | N             |
| 11         | TP53    | c.C844G                                                 | p.R282C             | nonsynonymous SNV       | Y  | Y         | X             | N             | X             | Y         | X        | Y             |
| 11         | UZAF1   | c.475_475msTAT                                          | p.Y158_E159msY      | missense                | Y  | N         | X             | N             | X             | N         | X        | Y             |
| 12         | BCR-ABL | p190                                                    | .                   | .                       | Y  | N         | X             | N             | X             | N         | X        | X             |
| 13         | DNMT3A  | c.1481-1G>T.c.1370-1G>T.c.1937-1G>T.c.1937-1G>T)        | .                   | splicing                | N  | Y         | Y             | Y             | X             | X         | X        | N             |
| 13         | DNMT3A  | c.G2056T                                                | p.D686Y             | nonsynonymous SNV       | N  | Y         | indeterminate | indeterminate | X             | X         | X        | Y             |
| 13         | DNMT3A  | c.1314_1315msGGAC                                       | p.M439fs            | frameshift insertion    | N  | Y         | indeterminate | N             | X             | X         | X        | N             |
| 13         | TP53    | c.G1945T                                                | p.E349R             | stopgain                | Y  | Y         | N             | N             | X             | X         | X        | N             |
| 13         | TP53    | c.G730A                                                 | p.G244S             | nonsynonymous SNV       | Y  | Y         | indeterminate | indeterminate | N             | X         | X        | N             |
| 14         | TP53    | c.386+1G>A                                              | .                   | splicing                | N  | Y         | N             | N             | X             | X         | X        | N             |
| 14         | TP53    | c.658-1G>C                                              | .                   | splicing                | N  | Y         | N             | N             | X             | X         | X        | N             |
| 14         | TP53    | c.658-2A>C                                              | .                   | splicing                | N  | Y         | N             | N             | X             | X         | X        | N             |
| 14         | TP53    | c.340_342del                                            | p.114del_114del     | nonframeshift deletion  | N  | Y         | N             | N             | X             | X         | X        | N             |
| 14         | TP53    | c.C843G                                                 | p.Q281E             | nonsynonymous SNV       | N  | Y         | N             | N             | X             | X         | X        | N             |
| 14         | TP53    | c.A837T                                                 | p.E286V             | nonsynonymous SNV       | N  | Y         | N             | N             | X             | X         | X        | N             |
| 14         | TP53    | c.598_599del                                            | p.G198fs            | frameshift deletion     | N  | Y         | N             | N             | X             | X         | X        | N             |
| 14         | TP53    | c.T584C                                                 | p.I195T             | nonsynonymous SNV       | N  | Y         | N             | N             | X             | X         | X        | N             |
| 14         | TP53    | c.1770C                                                 | p.L257P             | nonsynonymous SNV       | N  | Y         | N             | N             | X             | X         | X        | N             |
| 14         | TP53    | c.C454A                                                 | p.P152T             | nonsynonymous SNV       | N  | Y         | N             | N             | X             | X         | X        | N             |
| 14         | TP53    | c.C493T                                                 | p.Q165X             | stopgain                | N  | Y         | N             | N             | X             | X         | X        | N             |
| 14         | TP53    | c.817_818msTGC                                          | p.R273delmsLR       | nonframeshift insertion | Y  | Y         | N             | N             | X             | X         | X        | N             |
| 14         | TP53    | c.C844T                                                 | p.R282W             | nonsynonymous SNV       | N  | Y         | Y             | N             | X             | X         | X        | N             |
| 14         | TP53    | c.A488G                                                 | p.Y163C             | nonsynonymous SNV       | N  | Y         | N             | N             | X             | X         | X        | N             |
| 14         | TP53    | c.A659G                                                 | p.Y220C             | nonsynonymous SNV       | N  | Y         | N             | N             | X             | X         | X        | N             |
| 15         | DNMT3A  | c.C2205A                                                | p.Y735X             | stopgain                | N  | Y         | X             | N             | X             | X         | X        | N             |
| 16         | ATM     | c.G7267A                                                | p.E2423K            | nonsynonymous SNV       | N  | Y         | N             | N             | X             | X         | X        | X             |
| 16         | ATM     | c.G7593A                                                | p.M2531I            | nonsynonymous SNV       | N  | Y         | Y             | Y             | X             | X         | X        | X             |
| 16         | ATM     | c.G7032A                                                | p.V2344X            | stopgain                | N  | Y         | N             | N             | X             | X         | X        | X             |
| 16         | ATM     | c.14324G                                                | p.Y1442D            | nonsynonymous SNV       | N  | Y         | N             | N             | X             | X         | X        | X             |
| 16         | DDX41   | c.C1079T                                                | p.T360I             | nonsynonymous SNV       | N  | Y         | Y             | Y             | X             | X         | X        | X             |
| 16         | PPM1D   | c.C1434A                                                | p.C478X             | stopgain                | N  | Y         | N             | N             | X             | X         | X        | X             |
| 16         | PPM1D   | c.C1573T                                                | p.E525X             | stopgain                | N  | Y         | N             | N             | X             | X         | X        | X             |
| 16         | PPM1D   | c.1386delA                                              | p.Q462fs            | frameshift deletion     | N  | Y         | N             | N             | X             | X         | X        | X             |
| 16         | PPM1D   | c.1528delC                                              | p.S510fs            | frameshift deletion     | N  | Y         | N             | N             | X             | X         | X        | X             |
| 16         | PPM1D   | c.C1654T                                                | p.R552X             | stopgain                | N  | Y         | N             | indeterminate | X             | X         | X        | X             |
| 16         | SF3B1   | c.G199C                                                 | p.K666N             | nonsynonymous SNV       | N  | Y         | N             | N             | X             | X         | X        | X             |
| 16         | SF3B1   | c.G1998C                                                | p.K666N             | nonsynonymous SNV       | Y  | N         | N             | N             | X             | X         | X        | X             |
| 16         | TP53    | c.827_832del                                            | p.276_278del        | nonframeshift deletion  | N  | Y         | N             | N             | X             | X         | X        | X             |
| 16         | TP53    | c.1434C                                                 | p.L145P             | nonsynonymous SNV       | Y  | Y         | indeterminate | N             | X             | X         | X        | X             |
| 16         | TP53    | c.G743A                                                 | p.R248Q             | nonsynonymous SNV       | Y  | Y         | N             | N             | X             | X         | X        | X             |
| 16         | TP53    | c.C380T                                                 | p.S127F             | nonsynonymous SNV       | N  |           |               |               |               |           |          |               |

|    |        |                               |                     |                      |   |   |               |   |   |   |   |   |
|----|--------|-------------------------------|---------------------|----------------------|---|---|---------------|---|---|---|---|---|
| 19 | CUX1   | c.4323_4330del,c.4290_4297del | p.E1441fs,p.E1430fs | frameshift deletion  | N | Y | N             | X | X | N | X | X |
| 19 | IDH1   | c.G395A                       | p.R132H             | nonsynonymous SNV    | Y | Y | indeterminate | X | X | N | X | X |
| 19 | IDH2   | c.G419A                       | p.R140Q             | nonsynonymous SNV    | Y | Y | N             | X | X | N | X | X |
| 19 | NF1    | c.A5744G,c.A5807G             | p.K1915R,p.K1936R   | nonsynonymous SNV    | N | Y | N             | X | X | N | X | X |
| 19 | TET2   | c.2641delA                    | p.R881fs            | frameshift deletion  | N | N | Y             | X | X | Y | X | X |
| 19 | TET2   | c.4777dupA                    | p.T1592fs           | frameshift insertion | N | Y | N             | X | X | N | X | X |
| 19 | TP53   | c.T634G                       | p.F212V             | nonsynonymous SNV    | N | Y | N             | X | X | N | X | X |
| 19 | U2AF1  | c.470A>C                      | p.Q157P             | missense             | Y | N | N             | X | X | N | X | X |
| 20 | DNMT3A | c.C2245T                      | p.R749C             | nonsynonymous SNV    | N | N | Y             | X | X | Y | X | X |
| 20 | EZH2   | c.475G>A                      | p.G159R             | missense             | Y | N | N             | X | X | N | X | X |
| 20 | PPM1D  | c.1312dupG                    | p.P437fs            | frameshift insertion | N | Y | N             | X | X | N | X | X |
| 20 | PPM1D  | c.1529dupA                    | p.Q510fs            | frameshift insertion | N | Y | N             | X | X | N | X | X |
| 20 | PPM1D  | c.C1711T                      | p.Q571X             | stopgain             | N | Y | N             | X | X | N | X | X |
| 20 | TET2   | c.3594+2T>C                   | .                   | splicing             | N | Y | N             | X | X | N | X | X |
| 20 | TP53   | c.679_680insGGCT              | p.S227fs            | frameshift insertion | Y | Y | N             | X | X | N | X | X |
| 20 | TP53   | c.G646A                       | p.V216M             | nonsynonymous SNV    | N | Y | N             | X | X | N | X | X |
| 21 | ASXL1  | c.2421delT                    | p.V807fs            | frameshift deletion  | N | Y | N             | X | X | N | X | X |
| 21 | ATM    | c.T4324C                      | p.Y1442H            | nonsynonymous SNV    | N | Y | indeterminate | X | X | Y | X | X |
| 21 | DNMT3A | c.T884C                       | p.L295P             | nonsynonymous SNV    | Y | Y | indeterminate | X | X | N | X | X |
| 21 | DNMT3A | c.G2259A                      | p.W753X             | stopgain             | N | Y | N             | X | X | N | X | X |
| 21 | TET2   | c.T3755C                      | p.L1252P            | nonsynonymous SNV    | Y | Y | N             | X | X | N | X | X |
| 21 | TP53   | c.C388G                       | p.L130V             | nonsynonymous SNV    | N | Y | N             | X | X | N | X | X |
| 22 | ASXL1  | c.S689As*25                   | p.S689As*25         | frameshift           | Y | Y | X             | X | X | X | X | X |
| 22 | RUNX1  | c.S35T>C                      | p.L112P             | missense             | Y | Y | X             | X | X | X | X | X |
| 22 | SRSF2  | c.284C>A                      | p.P95H              | missense             | Y | Y | X             | X | X | X | X | X |
| 22 | TET2   | c.4374_4375insG               | p.E1459Gfs*19       | frameshift insertion | Y | Y | X             | X | X | X | X | X |
| 22 | TET2   | c.4546C>T                     | p.R1516*            | nonsense             | Y | Y | X             | X | X | X | X | X |
